# Supplementary material
Source: publisher figshare collection journal article supplement (https://gsajournals.figshare.com/ndownloader/files/27678057)
Supplement: Supplementary file 1 [file 27678057]

## Sheet: Least-adapted genes
File S5. GO terms significantly enriched in all four Strongyloides species for least-adapted genes functional subset
Source	Term ID	Term Name	Contributing Genes
GO:BP	GO:0006259	DNA metabolic process	SSTP_0001269900.1,SSTP_0000639200.1,SSTP_0000985700.1,SSTP_0000441300.1,SSTP_0001178000.5,SSTP_0000487800.1,SSTP_0000644300.1,SSTP_0000699200.1,SSTP_0001278000.1,SSTP_0001039100.1,SSTP_0000688700.1,SSTP_0000532300.1,SSTP_0000665900.1,SSTP_0000932500.1, SRAE_0000079000,SRAE_0000078200,SRAE_0000068100,SRAE_0000046800,SRAE_X000232700,SRAE_0000073700,SRAE_0000068900,SRAE_X000240100,SRAE_X000200500,SR…
GO:BP	GO:0015074	DNA integration	SSTP_0001269900.1,SSTP_0000639200.1,SSTP_0000985700.1,SSTP_0000441300.1,SSTP_0001178000.5,SSTP_0000487800.1,SSTP_0000644300.1,SSTP_0000699200.1,SSTP_0001278000.1,SSTP_0001039100.1,SSTP_0000688700.1,SSTP_0000532300.1,SSTP_0000665900.1,SSTP_0000932500.1, SRAE_0000079000,SRAE_0000078200,SRAE_X000232700,SRAE_0000073700,SRAE_0000068900,SRAE_X000240100,SRAE_X000200500,SRAE_X000199300,SRAE_0000052200,SR…
GO:BP	GO:0090304	nucleic acid metabolic process	SSTP_0001269900.1,SSTP_0000124500.1,SSTP_0000639200.1,SSTP_0000985700.1,SSTP_0000441300.1,SSTP_0001208100.1,SSTP_0001178000.5,SSTP_0000347100.1,SSTP_0000064900.1,SSTP_0000487800.1,SSTP_0000644300.1,SSTP_0000696800.1,SSTP_0000699200.1,SSTP_0001278000.1,SSTP_0001039100.1,SSTP_0000462700.1,SSTP_0000688700.1,SSTP_0000532300.1,SSTP_0000665900.1,SSTP_0000141900.1,SSTP_0000932500.1, SRAE_0000079000,SRAE…
GO:MF	GO:0003676	nucleic acid binding	SSTP_0001269900.1,SSTP_0000701100.1,SSTP_0000704833.1,SSTP_0001269800.1,SSTP_0000884800.1,SSTP_0000124500.1,SSTP_0000842500.1,SSTP_0001130800.1,SSTP_0000985800.1,SSTP_0000644700.1,SSTP_0000004650.1,SSTP_0000639200.1,SSTP_0000287200.1,SSTP_0000990700.1,SSTP_0000985700.1,SSTP_0000441300.1,SSTP_0001208100.1,SSTP_0001178000.5,SSTP_0000064900.1,SSTP_0000487800.1,SSTP_0000644300.1,SSTP_0000696800.1,SST…

## Sheet: Most-adapted genes
File S5. GO terms significantly enriched in all four Strongyloides species for most-adapted genes functional subset
Source	Term ID	Term Name	Contributing Genes
GO:BP	GO:0046034	ATP metabolic process	MTCE.3,MTCE.35,MTCE.25,MTCE.21,MTCE.34,MTCE.16,MTCE.23,MTCE.26,MTCE.31,MTCE.12, SSTP_0000911500.1,SSTP_0000168300.1,SSTP_0001253800.2,SSTP_0000911300.1,SSTP_0001168700.1,SSTP_0000823300.1,SSTP_0001244100.1, SRAE_X000110700,SRAE_1000136500,SRAE_1000020900,SRAE_2000334600,SRAE_2000037100,SRAE_X000121000,SRAE_X000082900,SRAE_2000333700,SRAE_2000256800,SRAE_2000254300, SPAL_0000783800.1,SPAL_00009926…
GO:CC	GO:0005840	ribosome	SSTP_0000552200.1,SSTP_0000765700.1,SSTP_0001179400.1,SSTP_0000042700.1,SSTP_0000890100.1,SSTP_0000127500.1,SSTP_0000052900.1,SSTP_0000611200.1,SSTP_0000730000.1,SSTP_0000297800.1,SSTP_0000119100.1,SSTP_0000143400.1,SSTP_0000339800.1,SSTP_0001004100.1,SSTP_0000930900.1,SSTP_0000340000.1,SSTP_0001085200.1, SRAE_1000338900,SRAE_2000138400,SRAE_2000249700,SRAE_2000018050,SRAE_2000174400,SRAE_2000098…
GO:CC	GO:0043228	non-membrane-bounded organelle	SSTP_0000643500.1,SSTP_0000552200.1,SSTP_0000765700.1,SSTP_0001179400.1,SSTP_0000767600.1,SSTP_0000264100.1,SSTP_0000042700.1,SSTP_0000629300.2,SSTP_0001093000.1,SSTP_0000890100.1,SSTP_0000559400.1,SSTP_0001088500.1,SSTP_0000127500.1,SSTP_0000748800.1,SSTP_0000052900.1,SSTP_0000611200.1,SSTP_0000040000.2,SSTP_0000961300.1,SSTP_0000730000.1,SSTP_0000297800.1,SSTP_0000119100.1,SSTP_0000383100.1,SST…
GO:CC	GO:0043232	intracellular non-membrane-bounded organelle	SSTP_0000643500.1,SSTP_0000552200.1,SSTP_0000765700.1,SSTP_0001179400.1,SSTP_0000767600.1,SSTP_0000264100.1,SSTP_0000042700.1,SSTP_0000629300.2,SSTP_0001093000.1,SSTP_0000890100.1,SSTP_0000559400.1,SSTP_0001088500.1,SSTP_0000127500.1,SSTP_0000748800.1,SSTP_0000052900.1,SSTP_0000611200.1,SSTP_0000040000.2,SSTP_0000961300.1,SSTP_0000730000.1,SSTP_0000297800.1,SSTP_0000119100.1,SSTP_0000383100.1,SST…
GO:MF	GO:0005198	structural molecule activity	SSTP_0000552200.1,SSTP_0000765700.1,SSTP_0001179400.1,SSTP_0000154300.1,SSTP_0000042700.1,SSTP_0001114600.1,SSTP_0000258700.1,SSTP_0000629300.2,SSTP_0000890100.1,SSTP_0000530400.1,SSTP_0000087500.1,SSTP_0000472100.1,SSTP_0000127500.1,SSTP_0000622400.1,SSTP_0000748800.1,SSTP_0000556800.1,SSTP_0000102800.1,SSTP_0000052900.1,SSTP_0000611200.1,SSTP_0000044100.1,SSTP_0000297800.1,SSTP_0000273500.1,SST…
GO:MF	GO:0042302	structural constituent of cuticle	SSTP_0000154300.1,SSTP_0001114600.1,SSTP_0000258700.1,SSTP_0000530400.1,SSTP_0000087500.1,SSTP_0000472100.1,SSTP_0000622400.1,SSTP_0000556800.1,SSTP_0000102800.1,SSTP_0000044100.1,SSTP_0000273500.1,SSTP_0000286800.1,SSTP_0000510400.1,SSTP_0000147300.1,SSTP_0000079900.1,SSTP_0000870600.1,SSTP_0000477900.1, SRAE_X000224800,SRAE_2000434700,SRAE_2000439500,SRAE_2000145200,SRAE_2000126900,SRAE_2000157…

## Sheet: Poorly-expressed genes
File S5. GO terms significantly enriched in genes that are poorly expressed in free-living females, in at least 3 Strongyloides species
Source	Term ID	Term Name	Contributing Genes
GO:BP	GO:0006508	proteolysis	SSTP_0000274400,SSTP_0001149800,SSTP_0000385400,SSTP_0000984600,SSTP_0001126300,SSTP_0000967000,SSTP_0001126500,SSTP_0000364910,SSTP_0000493100, SRAE_0000064100,SRAE_2000290720,SRAE_2000456700,SRAE_2000460200,SRAE_2000495500,SRAE_2000525400,SRAE_2000524100,SRAE_2000524500,SRAE_0000073100,SRAE_2000486000,SRAE_2000290000,SRAE_2000290500,SRAE_2000495410,SRAE_2000524000,SRAE_X000107250,SRAE_200029080…
GO:BP	GO:0019538	protein metabolic process	SRAE_0000064100,SRAE_2000290720,SRAE_2000456700,SRAE_2000460200,SRAE_2000495500,SRAE_2000525400,SRAE_2000524100,SRAE_2000524500,SRAE_0000073100,SRAE_2000150700,SRAE_2000424200,SRAE_2000486000,SRAE_1000000400,SRAE_2000290000,SRAE_2000290500,SRAE_2000421600,SRAE_2000440600,SRAE_2000495410,SRAE_2000524000,SRAE_X000107250,SRAE_2000290800,SRAE_X000199500,SRAE_2000478000,SRAE_2000289600,SRAE_2000497400…
GO:BP	GO:1901564	organonitrogen compound metabolic process	SRAE_0000064100,SRAE_2000290720,SRAE_2000456700,SRAE_2000460200,SRAE_2000495500,SRAE_2000525400,SRAE_2000524100,SRAE_2000524500,SRAE_0000073100,SRAE_2000150700,SRAE_2000424200,SRAE_2000486000,SRAE_1000000400,SRAE_2000290000,SRAE_2000290500,SRAE_2000421600,SRAE_2000440600,SRAE_2000495410,SRAE_2000524000,SRAE_X000107250,SRAE_2000290800,SRAE_X000199500,SRAE_2000478000,SRAE_2000289600,SRAE_2000497400…
GO:CC	GO:0005576	extracellular region	SSTP_0000274400,SSTP_0000485900,SSTP_0000705700,SSTP_0001133300,SSTP_0001222300,SSTP_0001133200,SSTP_0000700900,SSTP_0000701300,SSTP_0000700800,SSTP_0000701400,SSTP_0001108300,SSTP_0000967000, SRAE_2000477100,SRAE_2000477300,SRAE_2000524100,SRAE_2000506900,SRAE_2000460800,SRAE_0000025600,SRAE_2000046500,SRAE_X000226600,SRAE_2000486000,SRAE_X000038100,SRAE_2000451600, SPAL_0000191300,SPAL_00002116…
GO:MF	GO:0003824	catalytic activity	SRAE_0000055000,SRAE_0000064100,SRAE_2000290720,SRAE_2000456700,SRAE_2000460200,SRAE_2000495500,SRAE_2000525400,SRAE_2000524100,SRAE_2000524500,SRAE_0000073100,SRAE_0000072500,SRAE_0000048600,SRAE_2000150700,SRAE_2000424200,SRAE_2000406100,SRAE_1000000400,SRAE_2000290000,SRAE_2000290500,SRAE_2000421600,SRAE_2000440600,SRAE_2000495410,SRAE_2000524000,SRAE_2000290800,SRAE_X000199500,SRAE_2000478000…
GO:MF	GO:0004175	endopeptidase activity	SSTP_0000274400,SSTP_0001149800,SSTP_0000984600,SSTP_0001126300,SSTP_0000967000,SSTP_0001126500,SSTP_0000364910,SSTP_0000493100, SRAE_0000064100,SRAE_2000290720,SRAE_2000456700,SRAE_2000460200,SRAE_2000495500,SRAE_2000525400,SRAE_2000524100,SRAE_2000524500,SRAE_0000073100,SRAE_2000290000,SRAE_2000290500,SRAE_2000495410,SRAE_2000524000,SRAE_2000290800,SRAE_X000199500,SRAE_2000289600,SRAE_200049740…
GO:MF	GO:0004222	metalloendopeptidase activity	SSTP_0000274400,SSTP_0001149800,SSTP_0000984600,SSTP_0001126300,SSTP_0000967000,SSTP_0001126500,SSTP_0000364910,SSTP_0000493100, SRAE_2000290720,SRAE_2000456700,SRAE_2000460200,SRAE_2000495500,SRAE_2000525400,SRAE_2000524100,SRAE_2000524500,SRAE_0000073100,SRAE_2000290000,SRAE_2000290500,SRAE_2000495410,SRAE_2000524000,SRAE_2000290800,SRAE_X000199500,SRAE_2000289600,SRAE_2000497400,SRAE_200046930…
GO:MF	GO:0008233	peptidase activity	SSTP_0000274400,SSTP_0001149800,SSTP_0000984600,SSTP_0001126300,SSTP_0000967000,SSTP_0001126500,SSTP_0000364910,SSTP_0000493100, SRAE_0000064100,SRAE_2000290720,SRAE_2000456700,SRAE_2000460200,SRAE_2000495500,SRAE_2000525400,SRAE_2000524100,SRAE_2000524500,SRAE_0000073100,SRAE_2000290000,SRAE_2000290500,SRAE_2000495410,SRAE_2000524000,SRAE_2000290800,SRAE_X000199500,SRAE_2000289600,SRAE_200049740…
GO:MF	GO:0008237	metallopeptidase activity	SSTP_0000274400,SSTP_0001149800,SSTP_0000984600,SSTP_0001126300,SSTP_0000967000,SSTP_0001126500,SSTP_0000364910,SSTP_0000493100, SRAE_2000290720,SRAE_2000456700,SRAE_2000460200,SRAE_2000495500,SRAE_2000525400,SRAE_2000524100,SRAE_2000524500,SRAE_0000073100,SRAE_2000290000,SRAE_2000290500,SRAE_2000495410,SRAE_2000524000,SRAE_2000290800,SRAE_X000199500,SRAE_2000289600,SRAE_2000497400,SRAE_200046930…
GO:MF	GO:0008270	zinc ion binding	SRAE_2000290720,SRAE_2000456700,SRAE_2000525400,SRAE_2000524100,SRAE_2000524500,SRAE_0000073100,SRAE_2000290000,SRAE_2000290500,SRAE_2000495410,SRAE_2000524000,SRAE_2000289600,SRAE_2000469300,SRAE_0000047400,SRAE_X000147200,SRAE_2000497500,SRAE_2000289800,SRAE_0000081000, SPAL_0000011100,SPAL_0000398600,SPAL_0000525800,SPAL_0000583600,SPAL_0000583700,SPAL_0000615300,SPAL_0000675200,SPAL_000068240…
GO:MF	GO:0016787	hydrolase activity	SRAE_0000055000,SRAE_0000064100,SRAE_2000290720,SRAE_2000456700,SRAE_2000460200,SRAE_2000495500,SRAE_2000525400,SRAE_2000524100,SRAE_2000524500,SRAE_0000073100,SRAE_2000406100,SRAE_1000000400,SRAE_2000290000,SRAE_2000290500,SRAE_2000495410,SRAE_2000524000,SRAE_2000290800,SRAE_X000199500,SRAE_2000289600,SRAE_X000107100,SRAE_2000497400,SRAE_2000469300,SRAE_0000079500,SRAE_X000240300,SRAE_0000047400…
GO:MF	GO:0043169	cation binding	SRAE_2000290720,SRAE_2000456700,SRAE_2000460200,SRAE_2000495500,SRAE_2000525400,SRAE_2000524100,SRAE_2000524500,SRAE_0000073100,SRAE_2000290000,SRAE_2000290500,SRAE_2000495410,SRAE_2000524000,SRAE_2000290800,SRAE_2000289600,SRAE_2000497400,SRAE_2000469300,SRAE_0000047400,SRAE_X000147200,SRAE_2000497500,SRAE_2000497200,SRAE_2000289800,SRAE_0000081000,SRAE_2000325600, SPAL_0000011100,SPAL_000039860…
GO:MF	GO:0046872	metal ion binding	SRAE_2000290720,SRAE_2000456700,SRAE_2000460200,SRAE_2000495500,SRAE_2000525400,SRAE_2000524100,SRAE_2000524500,SRAE_0000073100,SRAE_2000290000,SRAE_2000290500,SRAE_2000495410,SRAE_2000524000,SRAE_2000290800,SRAE_2000289600,SRAE_2000497400,SRAE_2000469300,SRAE_0000047400,SRAE_X000147200,SRAE_2000497500,SRAE_2000497200,SRAE_2000289800,SRAE_0000081000,SRAE_2000325600, SPAL_0000011100,SPAL_000039860…
GO:MF	GO:0046914	transition metal ion binding	SRAE_2000290720,SRAE_2000456700,SRAE_2000525400,SRAE_2000524100,SRAE_2000524500,SRAE_0000073100,SRAE_2000290000,SRAE_2000290500,SRAE_2000495410,SRAE_2000524000,SRAE_2000289600,SRAE_2000469300,SRAE_0000047400,SRAE_X000147200,SRAE_2000497500,SRAE_2000289800,SRAE_0000081000, SPAL_0000011100,SPAL_0000398600,SPAL_0000525800,SPAL_0000583600,SPAL_0000583700,SPAL_0000615300,SPAL_0000675200,SPAL_000068240…
GO:MF	GO:0140096	catalytic activity, acting on a protein	SRAE_0000064100,SRAE_2000290720,SRAE_2000456700,SRAE_2000460200,SRAE_2000495500,SRAE_2000525400,SRAE_2000524100,SRAE_2000524500,SRAE_0000073100,SRAE_2000150700,SRAE_2000424200,SRAE_1000000400,SRAE_2000290000,SRAE_2000290500,SRAE_2000495410,SRAE_2000524000,SRAE_2000290800,SRAE_X000199500,SRAE_2000289600,SRAE_2000497400,SRAE_2000469300,SRAE_0000079500,SRAE_X000240300,SRAE_0000047400,SRAE_X000191400…

## Sheet: Highly-expressed genes
File S5. GO terms significantly enriched in genes that are highly expressed in free-living females, in at least 3 Strongyloides species
Source	Term ID	Term Name	Contributing Genes
GO:BP	GO:0006412	translation	SSTP_0000387200,SSTP_0000718800,SSTP_0000119100,SSTP_0001085200,SSTP_0000339800,SSTP_0000518600,SSTP_0000930900,SSTP_0000657600,SSTP_0000694000,SSTP_0000801100,SSTP_0000208100,SSTP_0000552200,SSTP_0001179400,SSTP_0000213300,SSTP_0000158900,SSTP_0001003100,SSTP_0001173900,SSTP_0000297800,SSTP_0000936200,SSTP_0001184700,SSTP_0000028200,SSTP_0000725500,SSTP_0000890100,SSTP_0000909200,SSTP_0000760300…
GO:BP	GO:0006518	peptide metabolic process	SSTP_0000387200,SSTP_0000718800,SSTP_0000119100,SSTP_0001085200,SSTP_0000339800,SSTP_0000518600,SSTP_0000930900,SSTP_0000657600,SSTP_0000694000,SSTP_0000801100,SSTP_0000208100,SSTP_0000552200,SSTP_0001179400,SSTP_0000213300,SSTP_0000158900,SSTP_0001003100,SSTP_0001173900,SSTP_0000297800,SSTP_0000936200,SSTP_0001184700,SSTP_0000028200,SSTP_0000725500,SSTP_0000890100,SSTP_0000909200,SSTP_0000760300…
GO:BP	GO:0009058	biosynthetic process	SSTP_0000387200,SSTP_0000718800,SSTP_0000823300,SSTP_0000119100,SSTP_0000428100,SSTP_0001085200,SSTP_0000339800,SSTP_0000518600,SSTP_0000930900,SSTP_0000657600,SSTP_0000694000,SSTP_0000801100,SSTP_0000208100,SSTP_0000552200,SSTP_0001179400,SSTP_0000213300,SSTP_0000158900,SSTP_0001003100,SSTP_0001173900,SSTP_0000297800,SSTP_0000269800,SSTP_0000936200,SSTP_0001184700,SSTP_0000028200,SSTP_0000725500…
GO:BP	GO:0009059	macromolecule biosynthetic process	SSTP_0000387200,SSTP_0000718800,SSTP_0000119100,SSTP_0001085200,SSTP_0000339800,SSTP_0000518600,SSTP_0000930900,SSTP_0000657600,SSTP_0000694000,SSTP_0000801100,SSTP_0000208100,SSTP_0000552200,SSTP_0001179400,SSTP_0000213300,SSTP_0000158900,SSTP_0001003100,SSTP_0001173900,SSTP_0000297800,SSTP_0000936200,SSTP_0001184700,SSTP_0000028200,SSTP_0000725500,SSTP_0000890100,SSTP_0000909200,SSTP_0000760300…
GO:BP	GO:0009144	purine nucleoside triphosphate metabolic process	SSTP_0000823300,SSTP_0000428100,SSTP_0000556300,SSTP_0000239700,SSTP_0000076400,SSTP_0001181600, SRAE_2000256800,SRAE_2000334600,SRAE_1000278400,SRAE_2000443400,SRAE_2000061100,SRAE_1000255700, SPAL_0000995200,SPAL_0000219500,SPAL_0001728100,SPAL_0000655400,SPAL_0000317800,SPAL_0000864500,SPAL_0000810100
GO:BP	GO:0009145	purine nucleoside triphosphate biosynthetic process	SSTP_0000823300,SSTP_0000428100,SSTP_0000556300,SSTP_0000239700,SSTP_0000076400,SSTP_0001181600, SRAE_2000256800,SRAE_2000334600,SRAE_1000278400,SRAE_2000443400,SRAE_2000061100,SRAE_1000255700, SPAL_0000995200,SPAL_0000219500,SPAL_0001728100,SPAL_0000655400,SPAL_0000317800,SPAL_0000864500,SPAL_0000810100
GO:BP	GO:0009205	purine ribonucleoside triphosphate metabolic process	SSTP_0000823300,SSTP_0000428100,SSTP_0000556300,SSTP_0000239700,SSTP_0000076400,SSTP_0001181600, SRAE_2000256800,SRAE_2000334600,SRAE_1000278400,SRAE_2000443400,SRAE_2000061100,SRAE_1000255700, SPAL_0000995200,SPAL_0000219500,SPAL_0001728100,SPAL_0000655400,SPAL_0000317800,SPAL_0000864500,SPAL_0000810100
GO:BP	GO:0009206	purine ribonucleoside triphosphate biosynthetic process	SSTP_0000823300,SSTP_0000428100,SSTP_0000556300,SSTP_0000239700,SSTP_0000076400,SSTP_0001181600, SRAE_2000256800,SRAE_2000334600,SRAE_1000278400,SRAE_2000443400,SRAE_2000061100,SRAE_1000255700, SPAL_0000995200,SPAL_0000219500,SPAL_0001728100,SPAL_0000655400,SPAL_0000317800,SPAL_0000864500,SPAL_0000810100
GO:BP	GO:0010467	gene expression	SSTP_0000387200,SSTP_0000718800,SSTP_0000119100,SSTP_0001085200,SSTP_0000339800,SSTP_0000518600,SSTP_0000930900,SSTP_0000657600,SSTP_0000694000,SSTP_0000801100,SSTP_0000208100,SSTP_0000552200,SSTP_0001179400,SSTP_0000213300,SSTP_0000158900,SSTP_0001003100,SSTP_0001173900,SSTP_0000297800,SSTP_0000936200,SSTP_0001184700,SSTP_0000028200,SSTP_0000725500,SSTP_0000890100,SSTP_0000909200,SSTP_0000760300…
GO:BP	GO:0019538	protein metabolic process	SRAE_0000064100,SRAE_2000290720,SRAE_2000456700,SRAE_2000460200,SRAE_2000495500,SRAE_2000525400,SRAE_2000524100,SRAE_2000524500,SRAE_0000073100,SRAE_2000150700,SRAE_2000424200,SRAE_2000486000,SRAE_1000000400,SRAE_2000290000,SRAE_2000290500,SRAE_2000421600,SRAE_2000440600,SRAE_2000495410,SRAE_2000524000,SRAE_X000107250,SRAE_2000290800,SRAE_X000199500,SRAE_2000478000,SRAE_2000289600,SRAE_2000497400…
GO:BP	GO:0034641	cellular nitrogen compound metabolic process	SSTP_0000387200,SSTP_0000718800,SSTP_0000823300,SSTP_0000119100,SSTP_0000428100,SSTP_0001085200,SSTP_0000339800,SSTP_0000518600,SSTP_0000930900,SSTP_0000657600,SSTP_0000694000,SSTP_0000801100,SSTP_0000208100,SSTP_0000552200,SSTP_0001179400,SSTP_0000213300,SSTP_0000158900,SSTP_0001003100,SSTP_0001168700,SSTP_0001173900,SSTP_0000297800,SSTP_0000936200,SSTP_0001184700,SSTP_0000028200,SSTP_0000725500…
GO:BP	GO:0034645	cellular macromolecule biosynthetic process	SSTP_0000387200,SSTP_0000718800,SSTP_0000119100,SSTP_0001085200,SSTP_0000339800,SSTP_0000518600,SSTP_0000930900,SSTP_0000657600,SSTP_0000694000,SSTP_0000801100,SSTP_0000208100,SSTP_0000552200,SSTP_0001179400,SSTP_0000213300,SSTP_0000158900,SSTP_0001003100,SSTP_0001173900,SSTP_0000297800,SSTP_0000936200,SSTP_0001184700,SSTP_0000028200,SSTP_0000725500,SSTP_0000890100,SSTP_0000909200,SSTP_0000760300…
GO:BP	GO:0043043	peptide biosynthetic process	SSTP_0000387200,SSTP_0000718800,SSTP_0000119100,SSTP_0001085200,SSTP_0000339800,SSTP_0000518600,SSTP_0000930900,SSTP_0000657600,SSTP_0000694000,SSTP_0000801100,SSTP_0000208100,SSTP_0000552200,SSTP_0001179400,SSTP_0000213300,SSTP_0000158900,SSTP_0001003100,SSTP_0001173900,SSTP_0000297800,SSTP_0000936200,SSTP_0001184700,SSTP_0000028200,SSTP_0000725500,SSTP_0000890100,SSTP_0000909200,SSTP_0000760300…
GO:BP	GO:0043603	cellular amide metabolic process	SSTP_0000387200,SSTP_0000718800,SSTP_0000119100,SSTP_0001085200,SSTP_0000339800,SSTP_0000518600,SSTP_0000930900,SSTP_0000657600,SSTP_0000694000,SSTP_0000801100,SSTP_0000208100,SSTP_0000552200,SSTP_0001179400,SSTP_0000213300,SSTP_0000158900,SSTP_0001003100,SSTP_0001173900,SSTP_0000297800,SSTP_0000936200,SSTP_0001184700,SSTP_0000028200,SSTP_0000725500,SSTP_0000890100,SSTP_0000909200,SSTP_0000760300…
GO:BP	GO:0043604	amide biosynthetic process	SSTP_0000387200,SSTP_0000718800,SSTP_0000119100,SSTP_0001085200,SSTP_0000339800,SSTP_0000518600,SSTP_0000930900,SSTP_0000657600,SSTP_0000694000,SSTP_0000801100,SSTP_0000208100,SSTP_0000552200,SSTP_0001179400,SSTP_0000213300,SSTP_0000158900,SSTP_0001003100,SSTP_0001173900,SSTP_0000297800,SSTP_0000936200,SSTP_0001184700,SSTP_0000028200,SSTP_0000725500,SSTP_0000890100,SSTP_0000909200,SSTP_0000760300…
GO:BP	GO:0044249	cellular biosynthetic process	SSTP_0000387200,SSTP_0000718800,SSTP_0000823300,SSTP_0000119100,SSTP_0000428100,SSTP_0001085200,SSTP_0000339800,SSTP_0000518600,SSTP_0000930900,SSTP_0000657600,SSTP_0000694000,SSTP_0000801100,SSTP_0000208100,SSTP_0000552200,SSTP_0001179400,SSTP_0000213300,SSTP_0000158900,SSTP_0001003100,SSTP_0001173900,SSTP_0000297800,SSTP_0000936200,SSTP_0001184700,SSTP_0000028200,SSTP_0000725500,SSTP_0000890100…
GO:BP	GO:0044267	cellular protein metabolic process	SSTP_0000387200,SSTP_0000718800,SSTP_0000119100,SSTP_0001085200,SSTP_0000339800,SSTP_0000518600,SSTP_0000930900,SSTP_0000657600,SSTP_0000694000,SSTP_0000801100,SSTP_0000208100,SSTP_0000552200,SSTP_0001179400,SSTP_0000213300,SSTP_0000158900,SSTP_0001003100,SSTP_0001173900,SSTP_0000297800,SSTP_0000936200,SSTP_0001184700,SSTP_0000028200,SSTP_0000725500,SSTP_0000890100,SSTP_0000909200,SSTP_0000760300…
GO:BP	GO:0044271	cellular nitrogen compound biosynthetic process	SSTP_0000387200,SSTP_0000718800,SSTP_0000823300,SSTP_0000119100,SSTP_0000428100,SSTP_0001085200,SSTP_0000339800,SSTP_0000518600,SSTP_0000930900,SSTP_0000657600,SSTP_0000694000,SSTP_0000801100,SSTP_0000208100,SSTP_0000552200,SSTP_0001179400,SSTP_0000213300,SSTP_0000158900,SSTP_0001003100,SSTP_0001173900,SSTP_0000297800,SSTP_0000936200,SSTP_0001184700,SSTP_0000028200,SSTP_0000725500,SSTP_0000890100…
GO:BP	GO:0046034	ATP metabolic process	SSTP_0000823300,SSTP_0000428100,SSTP_0001168700,SSTP_0000556300,SSTP_0000096500,SSTP_0000076400,SSTP_0000140700,SSTP_0000911300,SSTP_0001244100,SSTP_0001181600,SSTP_0001138700, SRAE_M000000005,SRAE_2000256800,SRAE_2000334600,SRAE_2000207300,SRAE_1000020900,SRAE_1000278400,SRAE_1000136300,SRAE_2000443400,SRAE_1000255700,SRAE_X000121000, SPAL_0000995200,SPAL_0000219500,SPAL_0000921600,SPAL_00010965…
GO:BP	GO:1901564	organonitrogen compound metabolic process	SRAE_0000064100,SRAE_2000290720,SRAE_2000456700,SRAE_2000460200,SRAE_2000495500,SRAE_2000525400,SRAE_2000524100,SRAE_2000524500,SRAE_0000073100,SRAE_2000150700,SRAE_2000424200,SRAE_2000486000,SRAE_1000000400,SRAE_2000290000,SRAE_2000290500,SRAE_2000421600,SRAE_2000440600,SRAE_2000495410,SRAE_2000524000,SRAE_X000107250,SRAE_2000290800,SRAE_X000199500,SRAE_2000478000,SRAE_2000289600,SRAE_2000497400…
GO:BP	GO:1901566	organonitrogen compound biosynthetic process	SSTP_0000387200,SSTP_0000718800,SSTP_0000823300,SSTP_0000119100,SSTP_0000428100,SSTP_0001085200,SSTP_0000339800,SSTP_0000518600,SSTP_0000930900,SSTP_0000657600,SSTP_0000694000,SSTP_0000801100,SSTP_0000208100,SSTP_0000552200,SSTP_0001179400,SSTP_0000213300,SSTP_0000158900,SSTP_0001003100,SSTP_0001173900,SSTP_0000297800,SSTP_0000269800,SSTP_0000936200,SSTP_0001184700,SSTP_0000028200,SSTP_0000725500…
GO:BP	GO:1901576	organic substance biosynthetic process	SSTP_0000387200,SSTP_0000718800,SSTP_0000823300,SSTP_0000119100,SSTP_0000428100,SSTP_0001085200,SSTP_0000339800,SSTP_0000518600,SSTP_0000930900,SSTP_0000657600,SSTP_0000694000,SSTP_0000801100,SSTP_0000208100,SSTP_0000552200,SSTP_0001179400,SSTP_0000213300,SSTP_0000158900,SSTP_0001003100,SSTP_0001173900,SSTP_0000297800,SSTP_0000269800,SSTP_0000936200,SSTP_0001184700,SSTP_0000028200,SSTP_0000725500…
GO:CC	GO:0005622	intracellular anatomical structure	SSTP_0000208900,SSTP_0000823300,SSTP_0000119100,SSTP_0000151300,SSTP_0000428100,SSTP_0001085200,SSTP_0000339800,SSTP_0000730000,SSTP_0000920600,SSTP_0000518600,SSTP_0001106300,SSTP_0000930900,SSTP_0000657600,SSTP_0000694000,SSTP_0000801100,SSTP_0000208100,SSTP_0000314800,SSTP_0000552200,SSTP_0001179400,SSTP_0000213300,SSTP_0000158900,SSTP_0001003100,SSTP_0000680600,SSTP_0001173900,SSTP_0000297800…
GO:CC	GO:0005737	cytoplasm	SSTP_0000208900,SSTP_0000151300,SSTP_0000730000,SSTP_0000920600,SSTP_0001106300,SSTP_0000657600,SSTP_0000694000,SSTP_0000314800,SSTP_0000680600,SSTP_0001173900,SSTP_0000746900,SSTP_0000753500,SSTP_0000611200,SSTP_0000255500,SSTP_0000299600,SSTP_0000086600,SSTP_0000369400,SSTP_0000570000,SSTP_0000460300,SSTP_0000040000,SSTP_0000416100,SSTP_0000076400,SSTP_0000442700,SSTP_0000172800,SSTP_0000960700…
GO:CC	GO:0005840	ribosome	SSTP_0000119100,SSTP_0001085200,SSTP_0000339800,SSTP_0000730000,SSTP_0000518600,SSTP_0000930900,SSTP_0000657600,SSTP_0000694000,SSTP_0000801100,SSTP_0000208100,SSTP_0000552200,SSTP_0001179400,SSTP_0000213300,SSTP_0000158900,SSTP_0001003100,SSTP_0001173900,SSTP_0000297800,SSTP_0000936200,SSTP_0001184700,SSTP_0000028200,SSTP_0000725500,SSTP_0000890100,SSTP_0000909200,SSTP_0000760300,SSTP_0000800500…
GO:CC	GO:0015934	large ribosomal subunit	SSTP_0001085200,SSTP_0000730000,SSTP_0001173900,SSTP_0000890100,SSTP_0000611200,SSTP_0000980000,SSTP_0000251100,SSTP_0000340000,SSTP_0001049900,SSTP_0000299600, SRAE_1000046600,SRAE_0000033600,SRAE_1000252000,SRAE_2000086900,SRAE_2000222500,SRAE_1000347400,SRAE_1000211700,SRAE_1000107700, SPAL_0001173100,SPAL_0000541600,SPAL_0000860400,SPAL_0001592900,SPAL_0000453200,SPAL_0000778400,SPAL_00012440…
GO:CC	GO:0015935	small ribosomal subunit	SSTP_0000930900,SSTP_0000657600,SSTP_0000694000,SSTP_0000158900,SSTP_0000297800,SSTP_0000725500,SSTP_0000909200,SSTP_0000331900,SSTP_0000058600, SRAE_1000155800,SRAE_2000267500,SRAE_2000311200,SRAE_2000501200,SRAE_2000100300,SRAE_1000024400,SRAE_1000245800,SRAE_2000074800,SRAE_2000323200, SPAL_0000121400,SPAL_0000296700,SPAL_0000155200,SPAL_0000187700,SPAL_0000154400,SPAL_0000677500,SPAL_00007734…
GO:CC	GO:0022626	cytosolic ribosome	SSTP_0000730000,SSTP_0000657600,SSTP_0000694000,SSTP_0001173900,SSTP_0000611200,SSTP_0000299600, SRAE_2000267500,SRAE_2000311200,SRAE_0000033600,SRAE_1000347400, SPAL_0001173100,SPAL_0000121400,SPAL_0000296700,SPAL_0001592900,SPAL_0001244000,SPAL_0001524200
GO:CC	GO:0032991	protein-containing complex	SSTP_0000823300,SSTP_0000428100,SSTP_0001085200,SSTP_0000730000,SSTP_0000930900,SSTP_0000657600,SSTP_0000694000,SSTP_0000158900,SSTP_0001173900,SSTP_0000297800,SSTP_0000725500,SSTP_0000890100,SSTP_0000909200,SSTP_0000611200,SSTP_0000980000,SSTP_0000251100,SSTP_0000950200,SSTP_0000556300,SSTP_0000264100,SSTP_0000331900,SSTP_0000340000,SSTP_0000145100,SSTP_0001045500,SSTP_0000011100,SSTP_0001049900…
GO:CC	GO:0043226	organelle	SSTP_0000208900,SSTP_0000119100,SSTP_0000151300,SSTP_0001085200,SSTP_0000339800,SSTP_0000730000,SSTP_0000920600,SSTP_0000518600,SSTP_0001106300,SSTP_0000930900,SSTP_0000657600,SSTP_0000694000,SSTP_0000801100,SSTP_0000208100,SSTP_0000314800,SSTP_0000552200,SSTP_0001179400,SSTP_0000213300,SSTP_0000158900,SSTP_0001003100,SSTP_0001173900,SSTP_0000297800,SSTP_0000936200,SSTP_0000746900,SSTP_0001184700…
GO:CC	GO:0043228	non-membrane-bounded organelle	SSTP_0000208900,SSTP_0000119100,SSTP_0000151300,SSTP_0001085200,SSTP_0000339800,SSTP_0000730000,SSTP_0000920600,SSTP_0000518600,SSTP_0001106300,SSTP_0000930900,SSTP_0000657600,SSTP_0000694000,SSTP_0000801100,SSTP_0000208100,SSTP_0000314800,SSTP_0000552200,SSTP_0001179400,SSTP_0000213300,SSTP_0000158900,SSTP_0001003100,SSTP_0001173900,SSTP_0000297800,SSTP_0000936200,SSTP_0001184700,SSTP_0000028200…
GO:CC	GO:0043229	intracellular organelle	SSTP_0000208900,SSTP_0000119100,SSTP_0000151300,SSTP_0001085200,SSTP_0000339800,SSTP_0000730000,SSTP_0000920600,SSTP_0000518600,SSTP_0001106300,SSTP_0000930900,SSTP_0000657600,SSTP_0000694000,SSTP_0000801100,SSTP_0000208100,SSTP_0000314800,SSTP_0000552200,SSTP_0001179400,SSTP_0000213300,SSTP_0000158900,SSTP_0001003100,SSTP_0001173900,SSTP_0000297800,SSTP_0000936200,SSTP_0000746900,SSTP_0001184700…
GO:CC	GO:0043232	intracellular non-membrane-bounded organelle	SSTP_0000208900,SSTP_0000119100,SSTP_0000151300,SSTP_0001085200,SSTP_0000339800,SSTP_0000730000,SSTP_0000920600,SSTP_0000518600,SSTP_0001106300,SSTP_0000930900,SSTP_0000657600,SSTP_0000694000,SSTP_0000801100,SSTP_0000208100,SSTP_0000314800,SSTP_0000552200,SSTP_0001179400,SSTP_0000213300,SSTP_0000158900,SSTP_0001003100,SSTP_0001173900,SSTP_0000297800,SSTP_0000936200,SSTP_0001184700,SSTP_0000028200…
GO:CC	GO:0044391	ribosomal subunit	SSTP_0001085200,SSTP_0000730000,SSTP_0000930900,SSTP_0000657600,SSTP_0000694000,SSTP_0000158900,SSTP_0001173900,SSTP_0000297800,SSTP_0000725500,SSTP_0000890100,SSTP_0000909200,SSTP_0000611200,SSTP_0000980000,SSTP_0000251100,SSTP_0000331900,SSTP_0000340000,SSTP_0001049900,SSTP_0000058600,SSTP_0000299600, SRAE_1000155800,SRAE_2000267500,SRAE_1000046600,SRAE_2000311200,SRAE_2000501200,SRAE_200010030…
GO:CC	GO:0045259	proton-transporting ATP synthase complex	SSTP_0000823300,SSTP_0000428100,SSTP_0000556300,SSTP_0000076400,SSTP_0001181600, SRAE_2000256800,SRAE_2000334600,SRAE_1000278400,SRAE_2000443400,SRAE_1000255700, SPAL_0000995200,SPAL_0000219500,SPAL_0000655400,SPAL_0000317800,SPAL_0000864500
GO:CC	GO:1990904	ribonucleoprotein complex	SSTP_0001085200,SSTP_0000730000,SSTP_0000930900,SSTP_0000657600,SSTP_0000694000,SSTP_0000158900,SSTP_0001173900,SSTP_0000297800,SSTP_0000725500,SSTP_0000890100,SSTP_0000909200,SSTP_0000611200,SSTP_0000980000,SSTP_0000251100,SSTP_0000331900,SSTP_0000340000,SSTP_0001049900,SSTP_0000058600,SSTP_0000299600, SRAE_1000155800,SRAE_2000448500,SRAE_2000267500,SRAE_2000020900,SRAE_1000046600,SRAE_200031120…
GO:MF	GO:0003735	structural constituent of ribosome	SSTP_0000119100,SSTP_0001085200,SSTP_0000339800,SSTP_0000518600,SSTP_0000930900,SSTP_0000657600,SSTP_0000694000,SSTP_0000801100,SSTP_0000208100,SSTP_0000552200,SSTP_0001179400,SSTP_0000213300,SSTP_0000158900,SSTP_0001003100,SSTP_0001173900,SSTP_0000297800,SSTP_0000936200,SSTP_0001184700,SSTP_0000028200,SSTP_0000725500,SSTP_0000890100,SSTP_0000909200,SSTP_0000760300,SSTP_0000611200,SSTP_0000980000…
GO:MF	GO:0005198	structural molecule activity	SSTP_0000510400,SSTP_0000119100,SSTP_0000151300,SSTP_0000258700,SSTP_0001085200,SSTP_0000339800,SSTP_0000518600,SSTP_0000930900,SSTP_0000657600,SSTP_0000606100,SSTP_0000694000,SSTP_0000801100,SSTP_0000208100,SSTP_0000314800,SSTP_0000552200,SSTP_0001179400,SSTP_0000213300,SSTP_0000158900,SSTP_0001003100,SSTP_0001173900,SSTP_0000297800,SSTP_0000936200,SSTP_0001184700,SSTP_0000028200,SSTP_0000725500…
